# Supplementary material for: Investigation of factors affecting prediction of protein-protein interaction networks by phylogenetic profiling
Source: PubMed Central journal article supplement (PMC2204017; doi:10.1186/1471-2164-8-393), 2007-10-29

a)

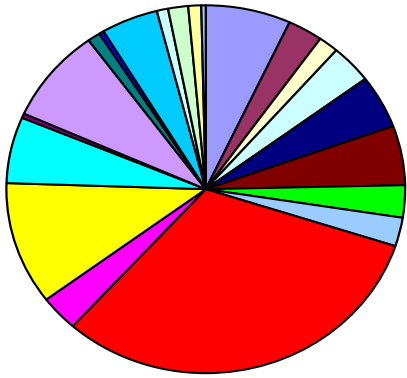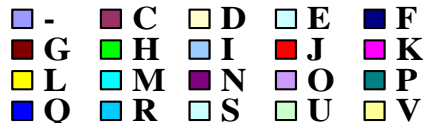

b)

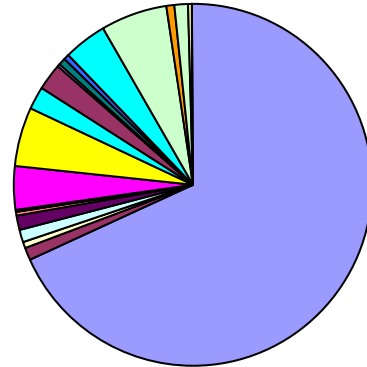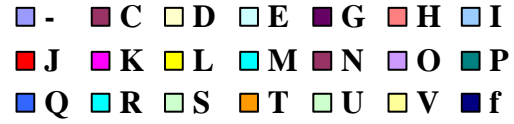

c)

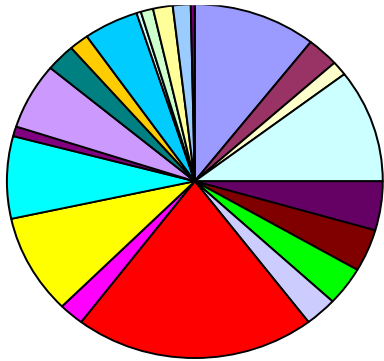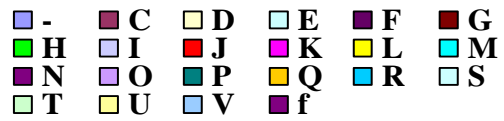

d)

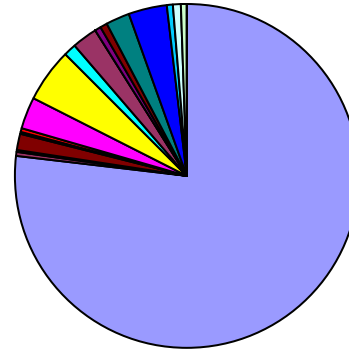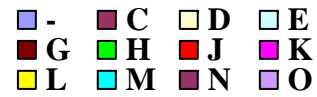

Supplement: 1471-2164-8-393-S2.pdf [file 1471-2164-8-393-S2.pdf]
